# Supplementary material for: A risk stratification scoring system for new-onset atrial fibrillation after ischemic stroke: A National cohort study
Source: PubMed Central journal article supplement — Medicine (Baltimore). 2020 Jul 2;99(27):e20881. doi: 10.1097/MD.0000000000020881 (PMC7337555; doi:10.1097/md.0000000000020881), 2020-07-02
Supplement: medi-99-e20881-s001.pdf [file medi-99-e20881-s001.pdf]

Patients were admitted due to ischemic stroke between 2001 to 2013  
(*n* = 471,048)

- < 40 years old: 9,849
- Carotid disease: 780  
Aneurysm in cerebral arteries or cerebral arteriovenous fistula: 4,024  
Stenosis over cerebrovascular disease: 7,758
- AF/AFL was diagnosed before ischemic stroke: 36,536  
AF/AFL was diagnosed at index ischemic stroke: 18,294
- Patients have below diseases during observation period
  - 1.VHD surgery: 1,055
  - 2.RHD: 4,546
  - 3.Hyperthyroidism: 9,376
  - 4.Anticoagulation before event of ischemic stroke: 8,956
- Death during the index admission: 9,878

Eligible ischemic stroke patients  
(*n* = 359,996)

DM  
(*n* = 98,103)

Non-DM  
(*n* = 261,893)

AF  
(*n* = 4,976)

Non-AF  
(*n* = 93,127)

AF  
(*n* = 16,127)

Non-AF  
(*n* = 245,766)

**eTable 1.** Diagnoses Used to Define the Cohorts, Comorbidities, and Outcomes

| Disease                                                                             | Criteria of Diagnosis                                                              |                                                                                                                                              |
|-------------------------------------------------------------------------------------|------------------------------------------------------------------------------------|----------------------------------------------------------------------------------------------------------------------------------------------|
| <b>Ischemic stroke and atrial fibrillation</b>                                      |                                                                                    |                                                                                                                                              |
| Ischemic stroke                                                                     | Defined from principal diagnosis of index hospitalization                          | ICD9-CM: 433-435                                                                                                                             |
| Atrial fibrillation                                                                 | Defined from diagnosis                                                             | ICD9-CM: 42731                                                                                                                               |
| <b>Excluding Diseases</b>                                                           |                                                                                    |                                                                                                                                              |
| Carotid disease                                                                     | Defined from diagnosis or carotid stenting or endarterectomy                       | ICD9-CM: 433.1                                                                                                                               |
| Aneurysm and fistula in cerebral arteries and Stenosis over cerebrovascular disease |                                                                                    | ICD9-CM: 437.3, 747.81, 447.0<br>ICD9-CM: 433.0, 433.2, 433.3, 433.8, 433.9, 434.90                                                          |
| Hyperthyroidism                                                                     | Defined from diagnosis plus treatment                                              | ICD9-CM: 242* and any anti-thyroid drugs                                                                                                     |
| Rheumatic heart disease                                                             | Defined from diagnosis                                                             | ICD9-CM:<br>394.0, 394.1, 394.2, 395*, 398.9*                                                                                                |
| <b>Comorbidities</b>                                                                |                                                                                    |                                                                                                                                              |
| Hypertension                                                                        | Defined from diagnosis plus treatment                                              | 401*, 402*, 403*, 404*, 405*<br>and any anti-hypertension drugs                                                                              |
| Diabetes mellitus                                                                   | Defined from diagnosis plus treatment with any oral hypoglycemic drugs and insulin | 250                                                                                                                                          |
| Ischemic heart disease                                                              | Defined from diagnosis                                                             | 410~414                                                                                                                                      |
| Heart failure                                                                       | Defined from diagnosis                                                             | 42                                                                                                                                           |
| Dyslipidemia                                                                        | Defined from diagnosis                                                             | 272                                                                                                                                          |
| Gout                                                                                | Defined from diagnosis                                                             | 274                                                                                                                                          |
| Chronic obstructive pulmonary disease                                               | Defined from diagnosis                                                             | 491, 492, 496                                                                                                                                |
| Peripheral arterial disease                                                         | Defined from diagnosis                                                             | 440.0, 440.2, 440.3, 440.8, 440.9, 443, 444.0, 444.22, 444.8, 447.8, and 447.9                                                               |
| Chronic kidney disease                                                              | Defined from diagnosis                                                             | 580~589, 403~404<br>016.0, 095.4, 236.9 250.4, 274.1, 442.1, , 447.3, ,440.1, 572.4, 642.1, 646.2 753.1<br>283.11, 403.01,and 404.02, 446.21 |
| Dialysis                                                                            | Defined from diagnosis in catastrophic registry data                               | 585                                                                                                                                          |

|                         |                        |                                                        |
|-------------------------|------------------------|--------------------------------------------------------|
| Abnormal liver function | Defined from diagnosis | 070, 456.0–456.2, 570, 571,<br>572.2–572.8, 573, V42.7 |
|-------------------------|------------------------|--------------------------------------------------------|

**History of Events**

|                 |                                           |         |
|-----------------|-------------------------------------------|---------|
| Ischemic stroke | Defined from diagnosis in hospitalization | 433~437 |
|-----------------|-------------------------------------------|---------|

| <b>Medication*</b>                                                        | <b>ATC code</b> |
|---------------------------------------------------------------------------|-----------------|
| Angiotensin converting enzyme inhibitors/angiotensin II receptor blockers | C09             |
| β-blockers                                                                | C07             |
| Calcium channel blockers                                                  | C08             |
| Statins                                                                   | C10AA           |

\*The usage of these medications was defined as being prescribed with the medication for at least 3 months.

ATC: Anatomical Therapeutic Chemical

**eTable 2.** Baseline clinical characteristics of the study patients

| Characteristics                       | DM (N = 98,103)        |                   | P value | Non-DM (N = 261,893)    |                    | P value |
|---------------------------------------|------------------------|-------------------|---------|-------------------------|--------------------|---------|
|                                       | Non-AF<br>(n = 93,127) | AF<br>(n = 4,976) |         | Non-AF<br>(n = 245,766) | AF<br>(n = 16,127) |         |
| Age (years)                           | 68.6±10.2              | 72.3±9.1          | <.001   | 68.4±12.3               | 74.8±10.2          | <.001   |
| Age group                             |                        |                   | <.001   |                         |                    | <.001   |
| < 55                                  | 10,167 (10.9)          | 223 (4.5)         |         | 41,739 (17.0)           | 790 (4.9)          |         |
| 55-64                                 | 22,872 (24.6)          | 793 (15.9)        |         | 52,001 (21.2)           | 1,826 (11.3)       |         |
| 65-74                                 | 33,082 (35.5)          | 1,862 (37.4)      |         | 68,626 (27.9)           | 4,733 (29.4)       |         |
| ≥ 75                                  | 27,006 (29.0)          | 2,098 (42.2)      |         | 83,400 (33.9)           | 8,778 (54.4)       |         |
| Gender                                |                        |                   | <.001   |                         |                    | <.001   |
| Male                                  | 49,070 (52.7)          | 2,411 (48.5)      |         | 152,437 (62.0)          | 9,256 (57.4)       |         |
| Female                                | 44,057 (47.3)          | 2,565 (51.5)      |         | 93,329 (38.0)           | 6,871 (42.6)       |         |
| Comorbidity                           |                        |                   |         |                         |                    |         |
| Previous myocardial infarction        | 3,576 (3.8)            | 271 (5.4)         | <.001   | 5,293 (2.2)             | 515 (3.2)          | <.001   |
| Coronary artery disease               | 22,954 (24.6)          | 1,755 (35.3)      | <.001   | 42,872 (17.4)           | 4,640 (28.8)       | <.001   |
| Chronic kidney disease                | 7,546 (8.1)            | 429 (8.6)         | .192    | 8,436 (3.4)             | 622 (3.9)          | .004    |
| Dialysis                              | 2,269 (2.4)            | 117 (2.4)         | .704    | 2,654 (1.1)             | 170 (1.1)          | .759    |
| Chronic obstructive pulmonary disease | 8,115 (8.7)            | 567 (11.4)        | <.001   | 25,255 (10.3)           | 2,508 (15.6)       | <.001   |
| Gout                                  | 8,039 (8.6)            | 492 (9.9)         | .002    | 23,924 (9.7)            | 2,013 (12.5)       | <.001   |
| Peripheral arterial disease           | 4,198 (4.5)            | 250 (5.0)         | .088    | 6,431 (2.6)             | 524 (3.2)          | <.001   |
| Hypertension                          | 82,875 (89.0)          | 4,609 (92.6)      | <.001   | 181,837 (74.0)          | 12,682 (78.6)      | <.001   |
| Heart failure                         | 5,602 (6.0)            | 504 (10.1)        | <.001   | 8,012 (3.3)             | 1,072 (6.6)        | <.001   |
| Dyslipidemia                          | 48,663 (52.3)          | 2,297 (46.2)      | <.001   | 76,355 (31.1)           | 3,607 (22.4)       | <.001   |
| Abnormal liver function               | 11,060 (11.9)          | 501 (10.1)        | <.001   | 22,266 (9.1)            | 1,363 (8.5)        | .009    |
| Old stroke                            | 12,063 (13.0)          | 755 (15.2)        | <.001   | 22,576 (9.2)            | 1,811 (11.2)       | <.001   |
| Medications                           |                        |                   |         |                         |                    |         |
| ACEI/ARB                              | 54,146 (58.1)          | 3,014 (60.6)      | .001    | 104,071 (42.3)          | 7,002 (43.4)       | .008    |
| CCB                                   | 43,973 (47.2)          | 2,534 (50.9)      | <.001   | 100,879 (41.0)          | 6,760 (41.9)       | .030    |
| β-blocker                             | 25,732 (27.6)          | 1,689 (33.9)      | <.001   | 55,746 (22.7)           | 4,527 (28.1)       | <.001   |
| Statin                                | 29,801 (32.0)          | 1,354 (27.2)      | <.001   | 59,236 (24.1)           | 2,613 (16.2)       | <.001   |

Abbreviations: AF: atrial fibrillation; DM: diabetes mellitus; ACEI/ARB: angiotensin converting enzyme inhibitors/ angiotensin II receptor blockers; CCB: calcium channel blocker.
